# Supplementary material for: Conserved in 186 Countries The RBD Fraction of SARS CoV-2 S-Protein With in-Silico T500S Mutation Strongly Blocks ACE2 Rejecting The Viral Spike; A Molecular-Docking Analysis.
Source: Research Square preprint supplement (doi:10.21203/rs.3.rs-258960/v1), 2021-03-11
Supplement: Supplementary file 1 [file b426fd64afd8c7b2a5f24d23.docx]

**
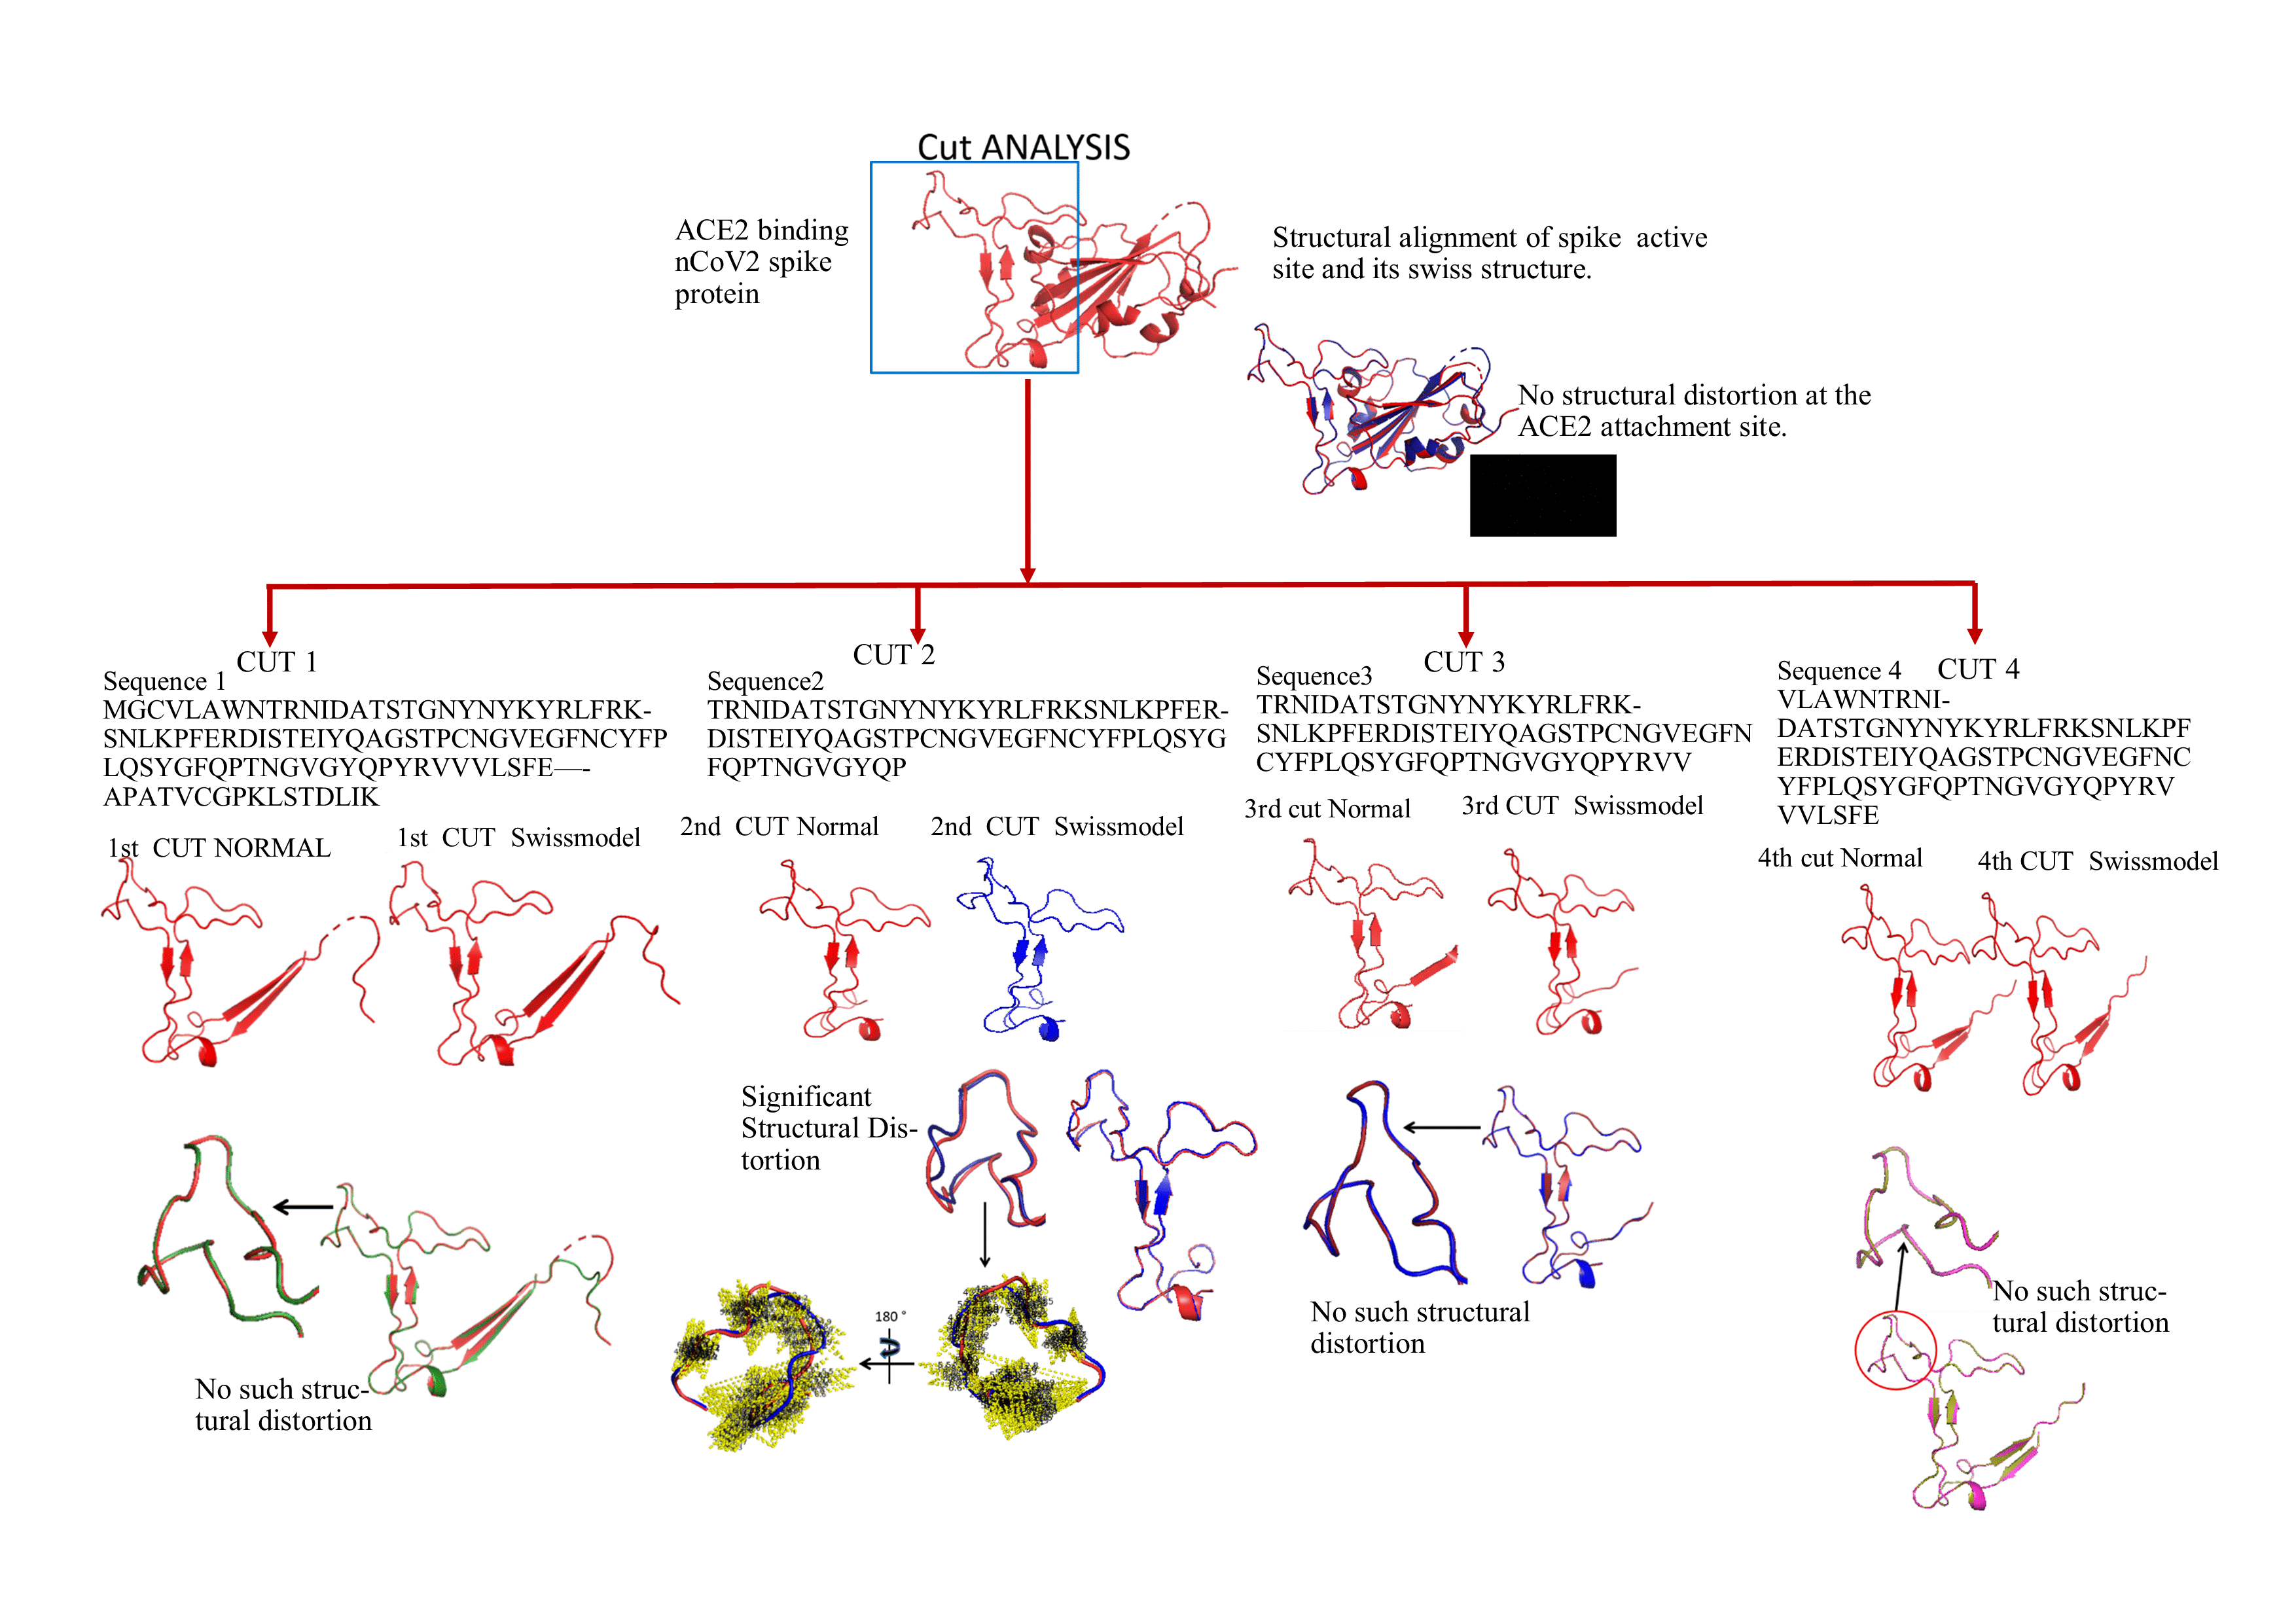
S Figure 1**: Different Cut site analysis of SARS COV-2 spike glycoprotein

**
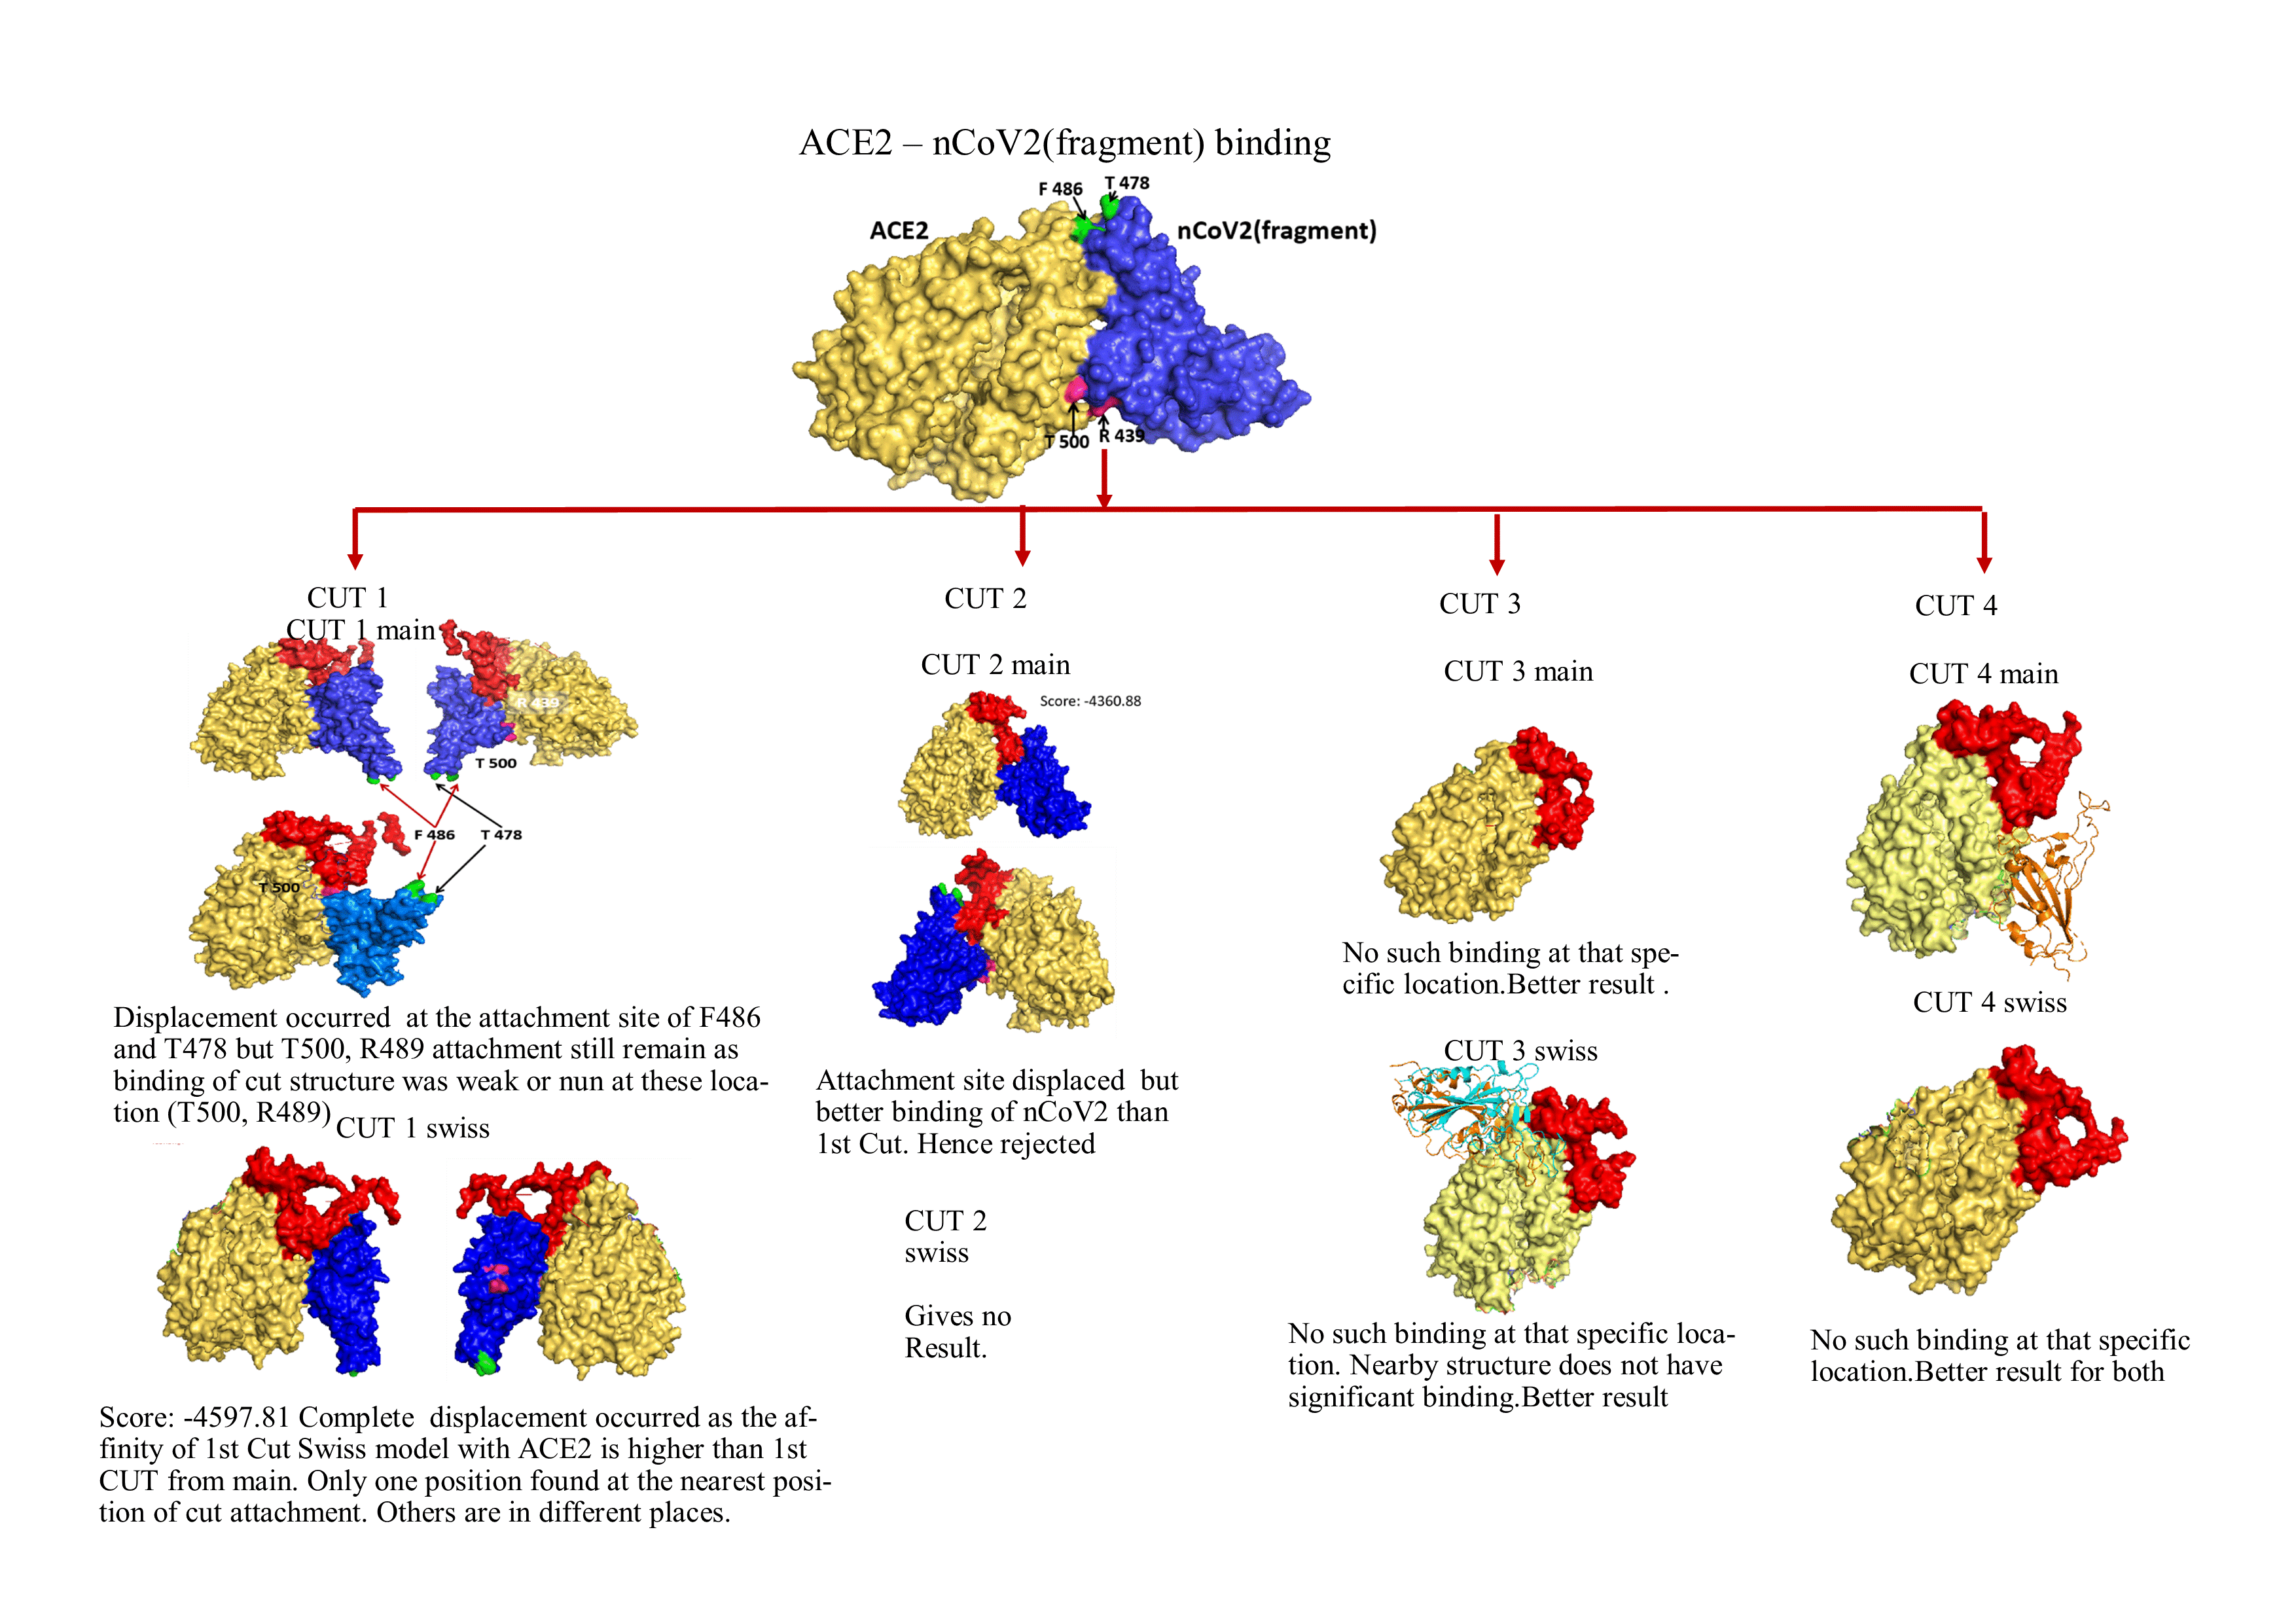
 Figure 2:** Binding interaction site analysis between Cut 1,2,3,4 and ACE Receptor .


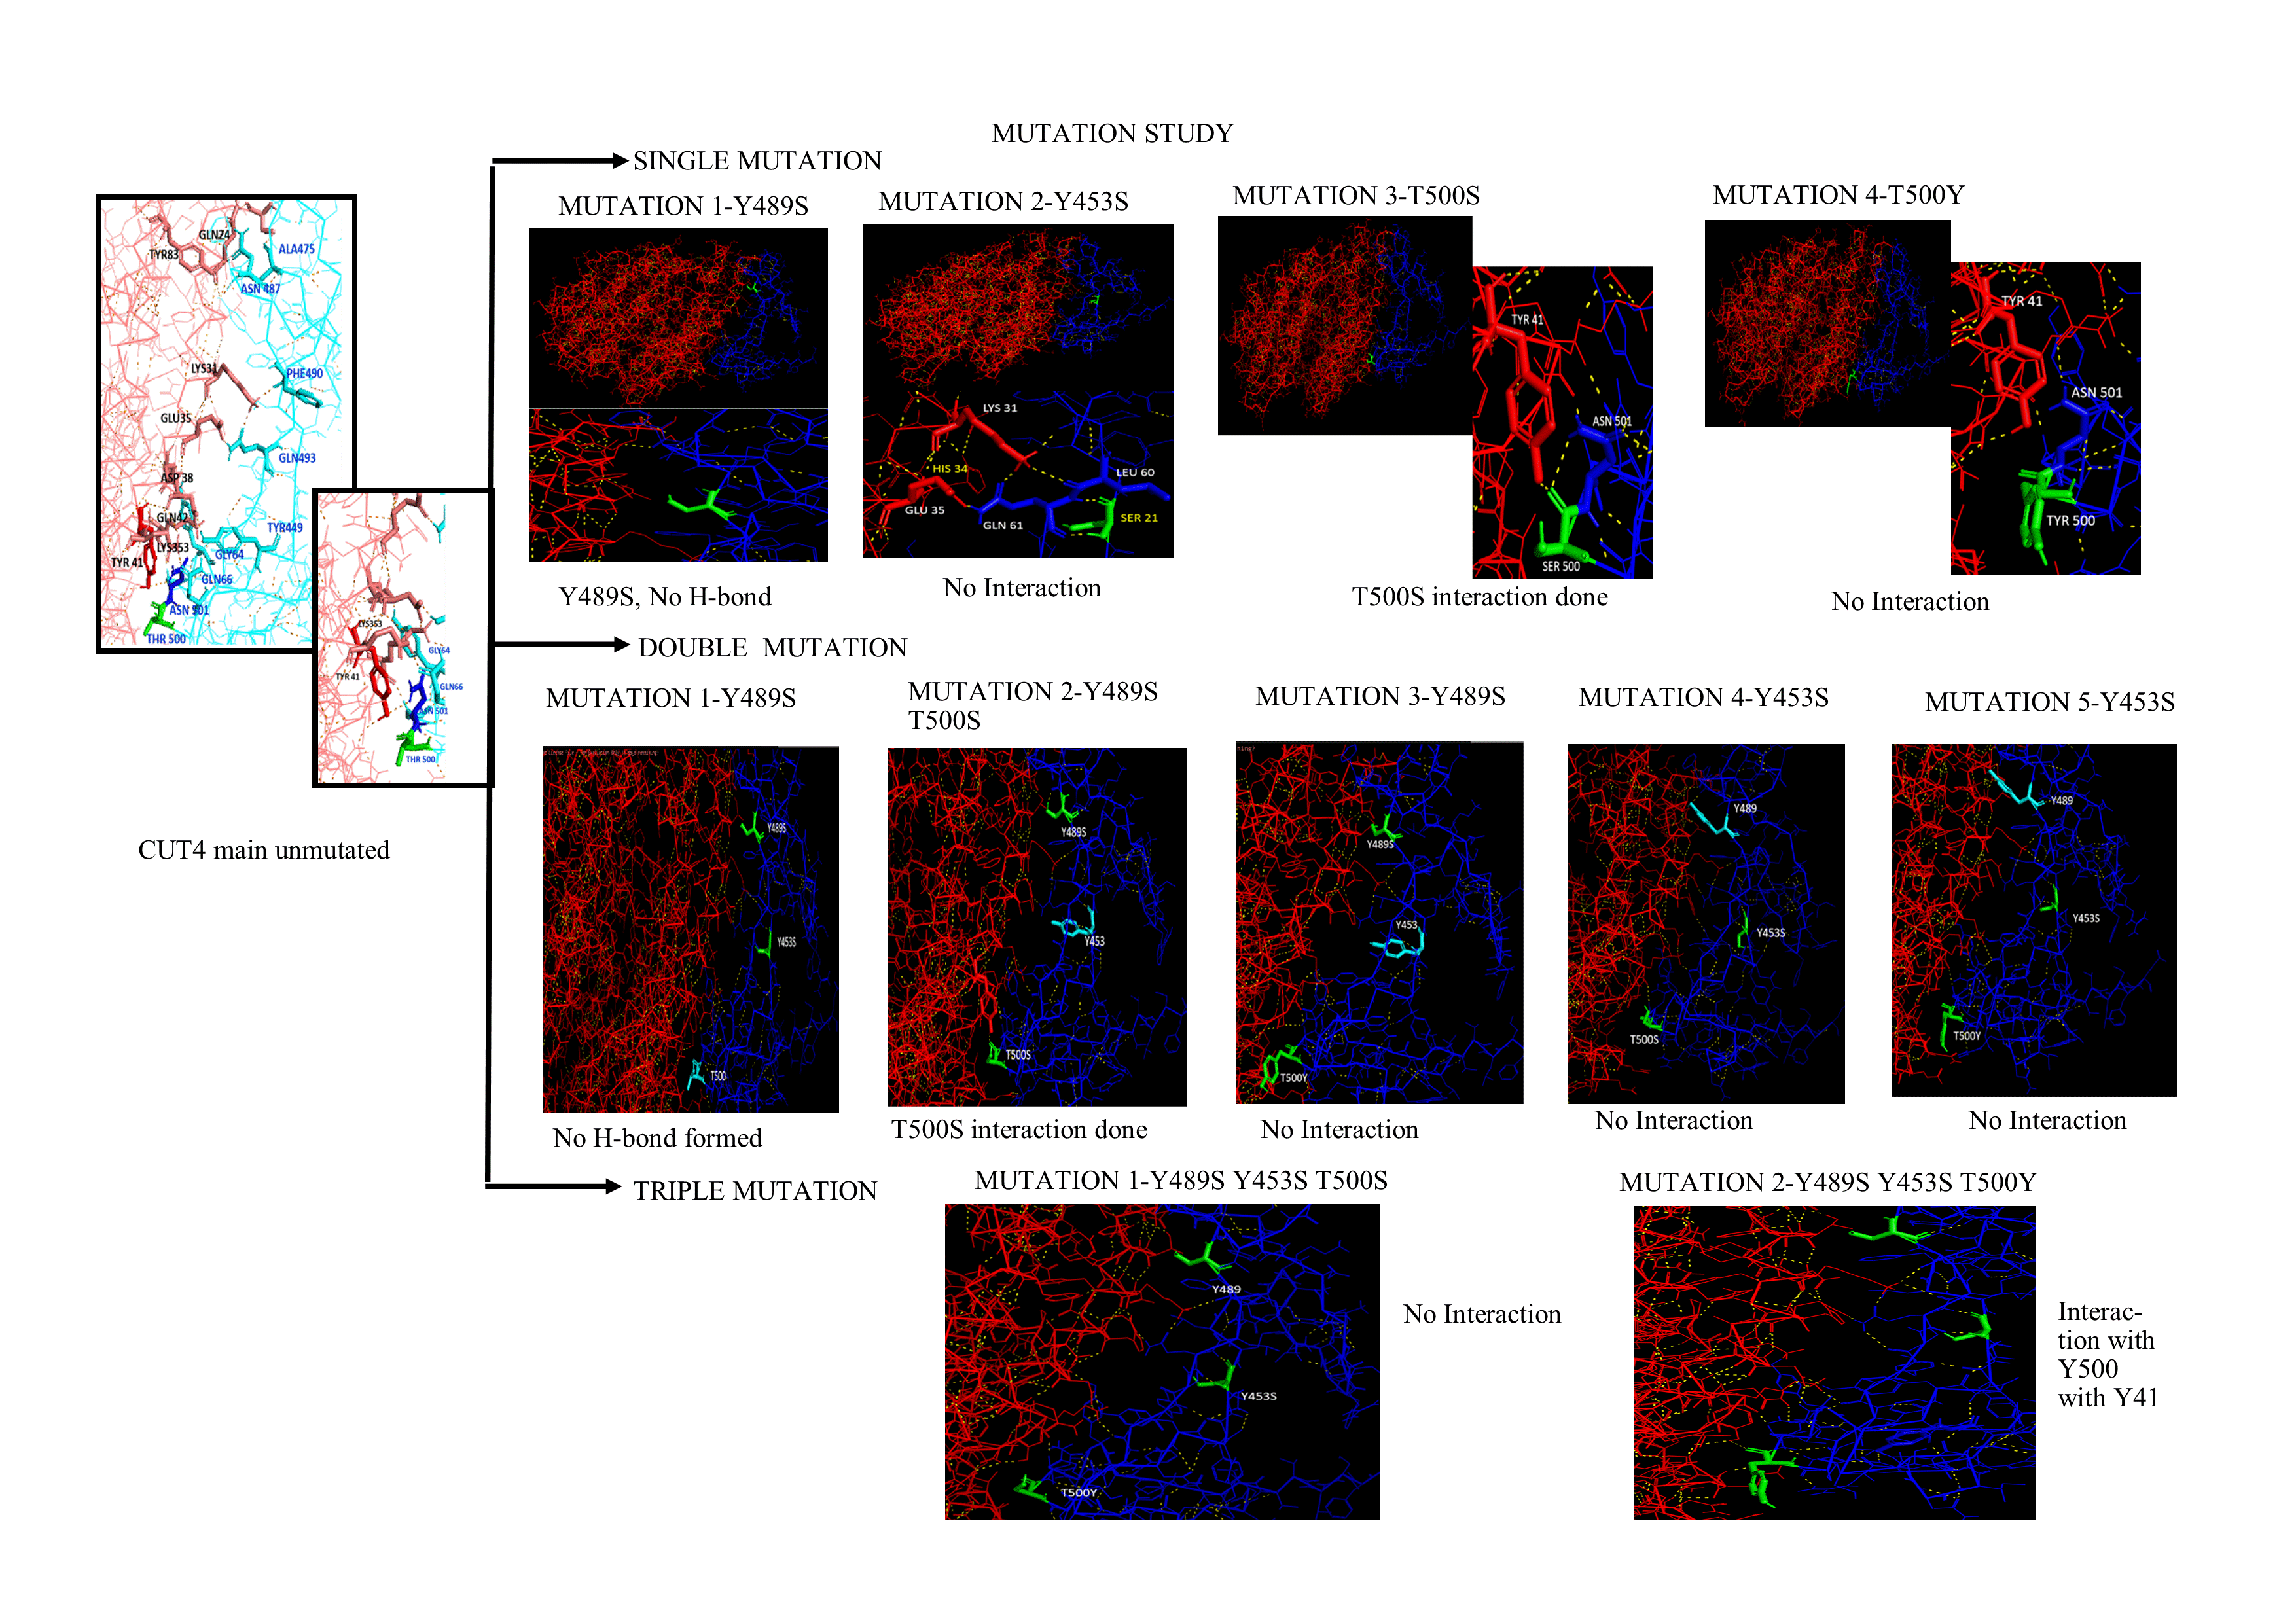
 **S Figure 3**: Depicts the binding sites for Cut 4 Main unmutated with ACE 2 receptor and the resultant interaction in the case of Single Mutation, Double Mutation and Triple mutation induced in Cut 4 with the same.
